# Supplementary material for: Silicon-Induced Morphological, Biochemical and Molecular Regulation in Phoenix dactylifera L. under Low-Temperature Stress
Source: MDPI journal article supplement (doi:10.3390/ijms24076036), 2023-03-23
Supplement: s1 [file s1]

**Table S1.** Date palm primers list

| Gene Name | Description                                                                         | Primer Sequence (5'-3')                              | Accession Number |
|-----------|-------------------------------------------------------------------------------------|------------------------------------------------------|------------------|
| LSi-1     | Low silicon 1 related gene <i>Oryza sativa</i> Japonica Group aquaporin NIP2-1-like | F: GACCTGTCTCGCATATCGCA<br>R: TCCAGGGGAAATGCCTGAAC   | XM_015770687.1   |
| SOD       | Superoxide dismutase [Fe], chloroplastic                                            | F: GTTTGGGATTACTCGCCCCT<br>R: GCATGCTGCACAAACAGAAC   | XM_008807700.3   |
| NCED1     | 9-cis-epoxycarotenoid dioxygenase                                                   | F: ACCTACTTCCGCTTTGACCG<br>R: TGGGCTTCATGACGATCTGG   | XM_008799733.3   |
| SDR       | Phoenix dactylifera short chain dehydrogenase/reductase                             | F: ATGTCTAAGCAGAGGTTGG<br>R: CTTGTACTIONGCACTTGCCG   | XM_008812671.4   |
| PYL4      | abscisic acid receptor PYL4-like                                                    | F: ATGCCTCACCCCGCT<br>R: CACCATCGAGCAGCATTGG         | XM_008801643.3   |
| PPMA-3    | Phoenix dactylifera plasma membrane ATPase-3                                        | F: GGATTCTGCTCACTCCCACT<br>R: CTCCAAGGGTATGTTCTCCAAA | XM_039117314.1   |
| PPMA-4    | Phoenix dactylifera plasma membrane ATPase-4                                        | F: GGAGGTTGCAAGGCTCCGT<br>R: CCTCAACATCCATCGCCCAT    | XM_008783611.4   |
| ICE1-like | Phoenix dactylifera transcription factor ICE1-like, transcript variant X1           | F: AAGTCAACCACCCAGGACCA<br>R: CGTGATGGGCTTTGCACTTC   | XM_008792480.4   |
| SRC-2     | BON1-associated protein 2-like                                                      | F: AGAAGCTCAAGGTGGCTCTG<br>R: AGCCTGTAGCTAAGGAAGTGC  | XM_039115615.1   |
| Act       | Phoenix dactylifera actin                                                           | F: ATTCTGCAGGACTGGGAAGC<br>R: CGAACAGGTTGGCTGAATTGT  | XM_008800105.4   |
